# Supplementary material for: Severity of COVID-19 in Patients with Diarrhoea: A Systematic Review and Meta-Analysis
Source: MDPI journal article supplement (doi:10.3390/tropicalmed8020084), 2023-01-26
Supplement: s1 [file s1]

## Supplementary Materials

### Table captions

Table S1. Newcastle-Ottawa scale (NOS) summary assessment of the risk of bias in 16 cohort studies.

Table S2. Newcastle-Ottawa scale (NOS) summary assessment of the risk of bias in 2 case-control studies.

Table S3. Newcastle-Ottawa scale (NOS) summary assessment of the risk of bias for a cross-sectional study.

Table S4. National Institutes of Health (NIH) study quality assessment tool for risk of bias for case-series studies.

### Figure captions

Figure S1. Pooled prevalence of overall gastrointestinal symptoms among 88 included studies.

Figure S2. A pooled estimate of the prevalence of diarrhoea symptoms in COVID-19 infected patients.

Figure S3. A pooled estimate of the prevalence of nausea and vomiting symptoms in COVID-19 infected patients.

Figure S4. A pooled estimate of the prevalence of abdominal pain symptoms in COVID-19 infected patients.

Figure S5. A pooled estimate of the prevalence of loss of appetite symptoms in COVID-19 infected patients.

Figure S6. A funnel plot for publication bias for the severity of diarrhoea in COVID-19 infected patients.

Figure S7. Forest plot demonstrating sub-groups analysis of COVID-19-infected patients' diarrhea in Asian *versus* non-Asian groups.

[illegible]

**Table S2.** Newcastle-Ottawa scale (NOS) summary assessment of the risk of bias in 2 case-control studies.

| Study, year<br>(ref.)               | Selection              |                                    |                          |                           | Comparability of<br>cases and<br>controls |                           | Exposure                                                          |                                        |     | Score<br>(0-9) | Evidence<br>of Quality |
|-------------------------------------|------------------------|------------------------------------|--------------------------|---------------------------|-------------------------------------------|---------------------------|-------------------------------------------------------------------|----------------------------------------|-----|----------------|------------------------|
|                                     | Definition<br>of cases | Representativeness of<br>the cases | Selection of<br>Controls | Definition<br>of controls |                                           | Assessment<br>of exposure | The<br>method<br>of<br>ascertainment<br>for cases and<br>controls | same<br>of<br>Non-<br>Response<br>rate |     |                |                        |
| Case-control                        |                        |                                    |                          |                           |                                           |                           |                                                                   |                                        |     |                |                        |
| Nobel Y <i>et.al</i> ,<br>2020 (18) | ★                      | ★                                  | ★                        | ★                         | ★ ★                                       | ★                         | ★                                                                 | ★                                      | 9-9 | good           |                        |
| Puah S, 2021<br>(51)                | ★                      |                                    |                          |                           |                                           | ★                         | ★                                                                 |                                        | 7-9 | good           |                        |

Scoring is given as follows; 3 or 4 stars in the selection, 1 or 2 stars in comparability, and 2 or 3 stars in outcomes are required for a “good” quality score. A “fair” quality score required 2 stars within the selection, 1 or 2 stars in comparability, and 2 or 3 stars in outcomes. A “poor” quality score indicates 0 or 1 star in the selection, 0 stars for comparability, or 0 or 1 star for outcomes.

**Table S3.** Newcastle-Ottawa scale (NOS) summary assessment of the risk of bias in a cross-sectional study.

| Study, year<br>(ref.)              | Representativeness<br>of the sample | Sample<br>selection<br>procedure | Non-<br>response rate | Risk factor<br>exposure<br>assessment | Adjustment<br>for<br>confounders | Reliability of<br>diagnosis | Assessment of<br>outcome | Statistical test | Score (0-8) |
|------------------------------------|-------------------------------------|----------------------------------|-----------------------|---------------------------------------|----------------------------------|-----------------------------|--------------------------|------------------|-------------|
| Chen D <i>et.al</i> ,<br>2022 (19) | Yes                                 | Convenience                      | No                    | Yes                                   | No                               | Yes                         | Yes                      | Yes              | 5           |

Scoring is given as follows; very good studies: 9-10 points, good studies: 7-8 points, satisfactory studies: 5-6 points and unsatisfactory studies: 0 to 4 points

**Table S4.** National Institutes of Health (NIH) study quality assessment tool for risk of bias for case-series studies.

| Study, year (ref.)               | 1. Was the study question or objective clearly stated? | 2. Was the study population clearly and fully described, including a case definition? | 3. Were the cases consecutive? | 4. Were the subject comparable? | 5. Was the intervention clearly described? | 6. Were the outcome measures clearly defined, valid, reliable, and implemented consistently across all studies? | 7. Was the length of follow-up adequate? | 8. Were the statistical method well described? | 9. Were the result well described? | 10. Grade AHRQ standard |
|----------------------------------|--------------------------------------------------------|---------------------------------------------------------------------------------------|--------------------------------|---------------------------------|--------------------------------------------|-----------------------------------------------------------------------------------------------------------------|------------------------------------------|------------------------------------------------|------------------------------------|-------------------------|
| Wang D <i>et.al</i> , 2020 (20)  | Yes                                                    | Yes                                                                                   | Yes                            | NK                              | Yes                                        | Yes                                                                                                             | Yes                                      | Yes                                            | Yes                                | Good                    |
| Xu X-W <i>et.al</i> , 2020 (21)  | Yes                                                    | Yes                                                                                   | NK                             | NK                              | Yes                                        | Yes                                                                                                             | Yes                                      | Yes                                            | Yes                                | Good                    |
| Zhang G <i>et.al</i> , 2020 (22) | Yes                                                    | Yes                                                                                   | NK                             | Yes                             | Yes                                        | Yes                                                                                                             | Yes                                      | Yes                                            | Yes                                | Good                    |

AHRQ = Agency for Healthcare Research and Quality; GRADE = Grading of Recommendations, Assessment, Development, and Evaluation; NK= not known. Questions 1,6,7 must be present for AHRQ standards: “good” if all three factors are present, “fair” if two factor are present, and “poor” or “insufficient quality” if one factor is present.

## Gastrointestinal symptoms

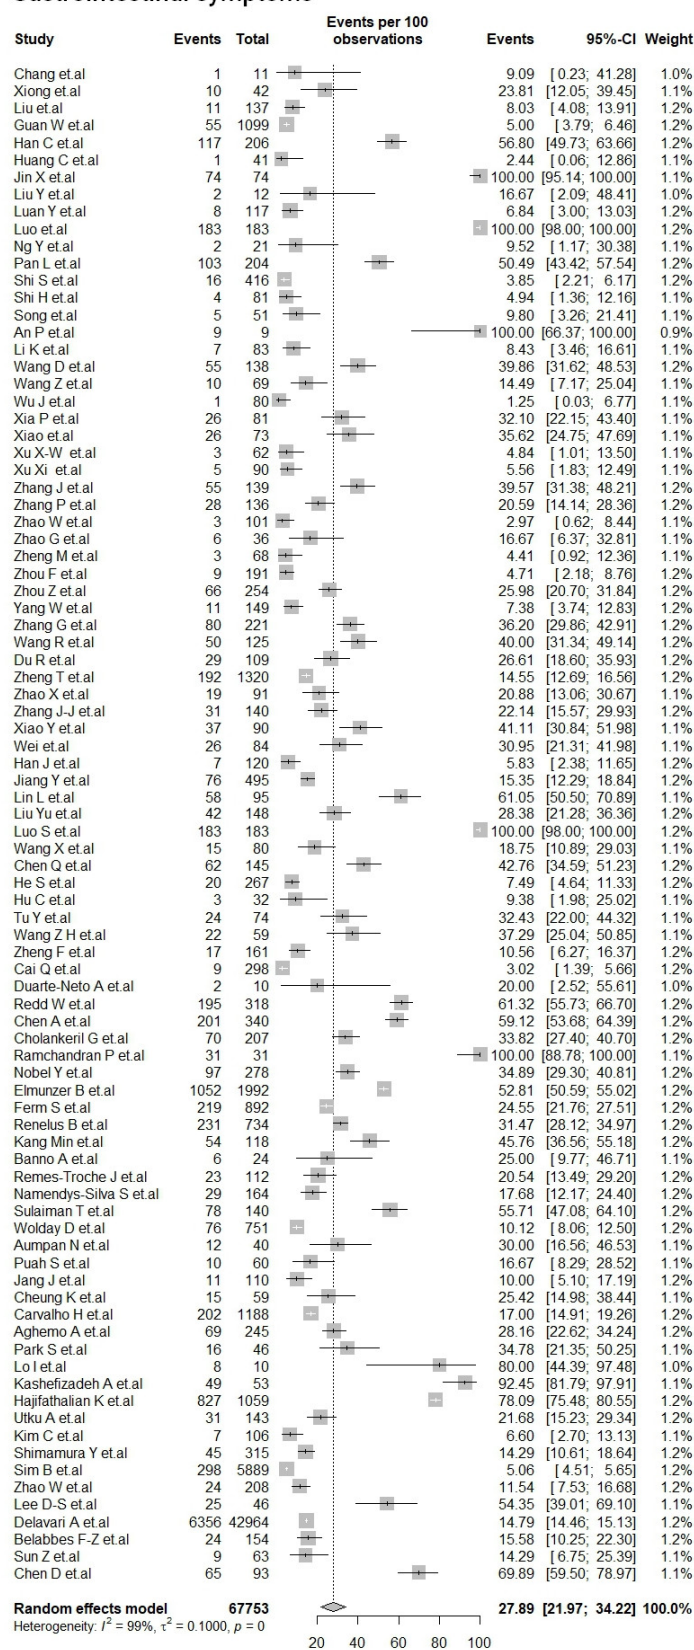

**Figure S1.** Pooled prevalence of overall gastrointestinal symptoms among 88 included studies.

## Diarrhoea

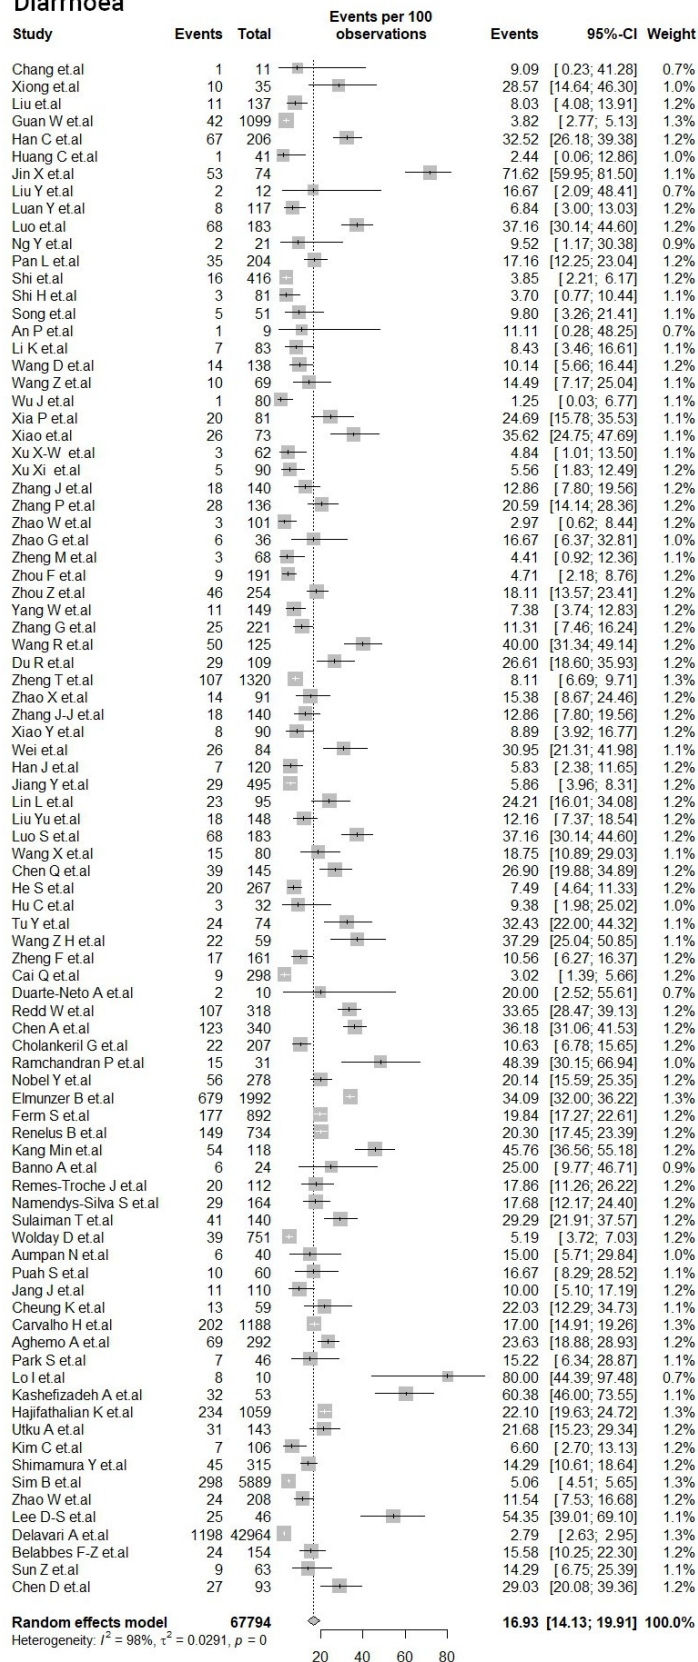

**Figure S2.** A pooled estimate of the prevalence of diarrhoea symptoms in COVID-19 infected patients.



## Nausea or Vomiting

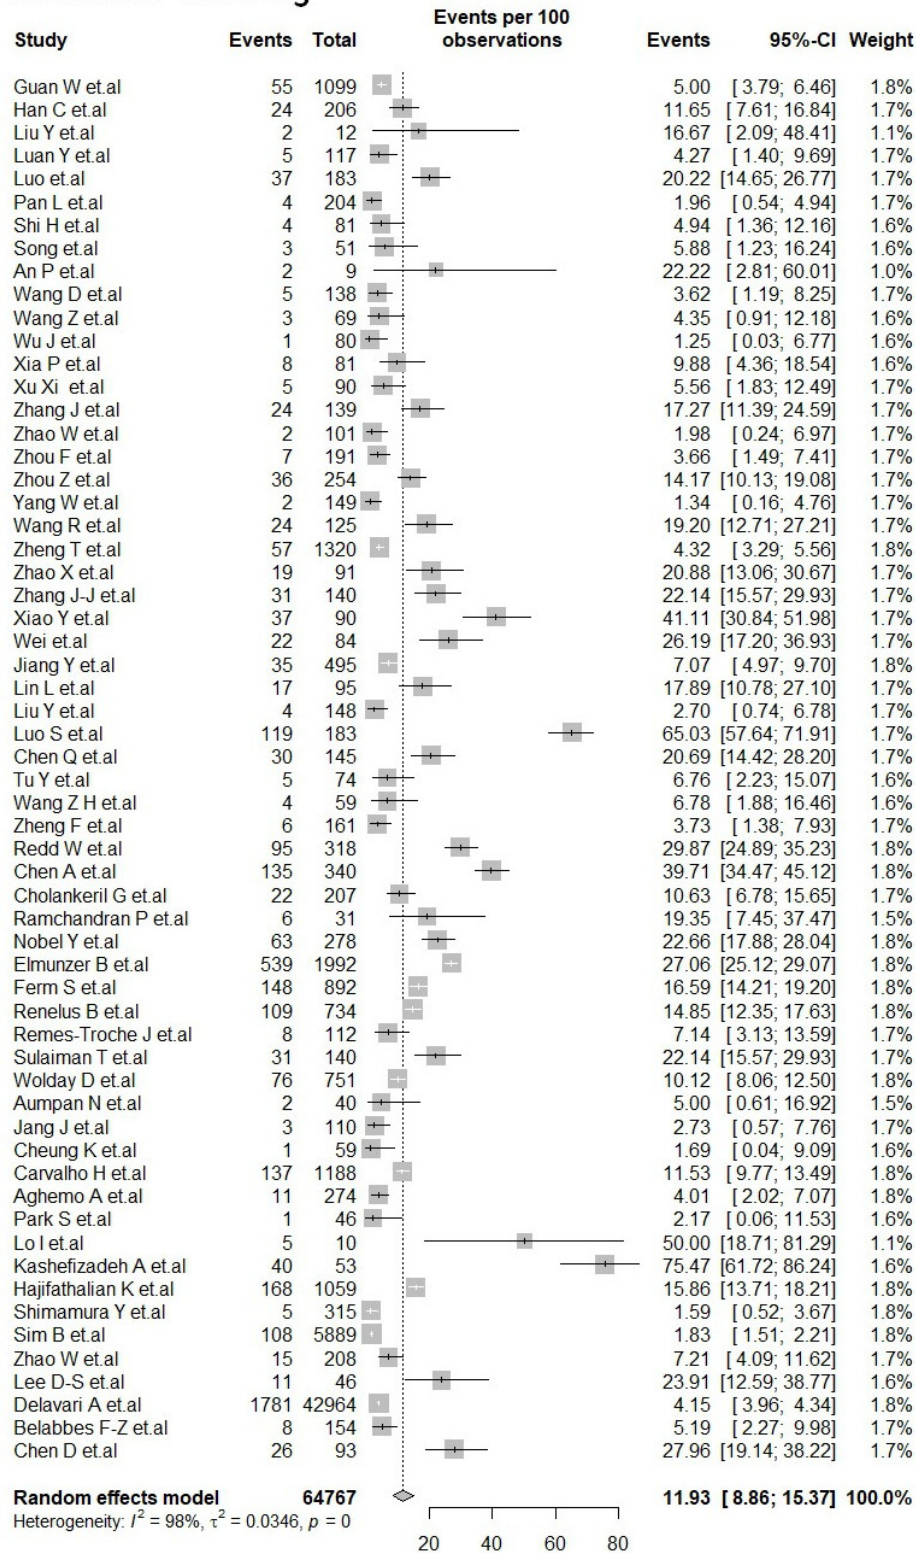

**Figure S3.** A pooled estimate of the prevalence of nausea and vomiting symptoms in COVID-19 infected patients.

## Abdominal pain

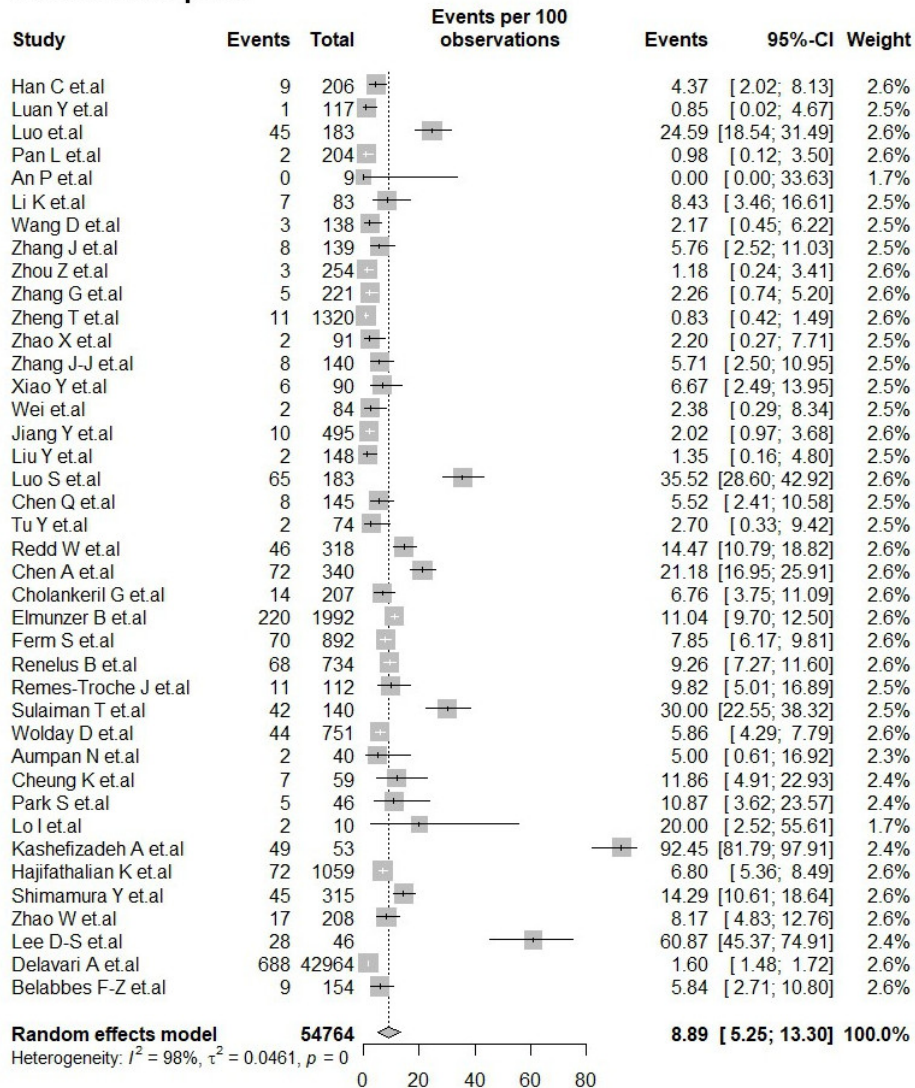

**Figure S4.** A pooled estimate of the prevalence of abdominal pain symptoms in COVID-19 infected patients.



## Loss of appetite

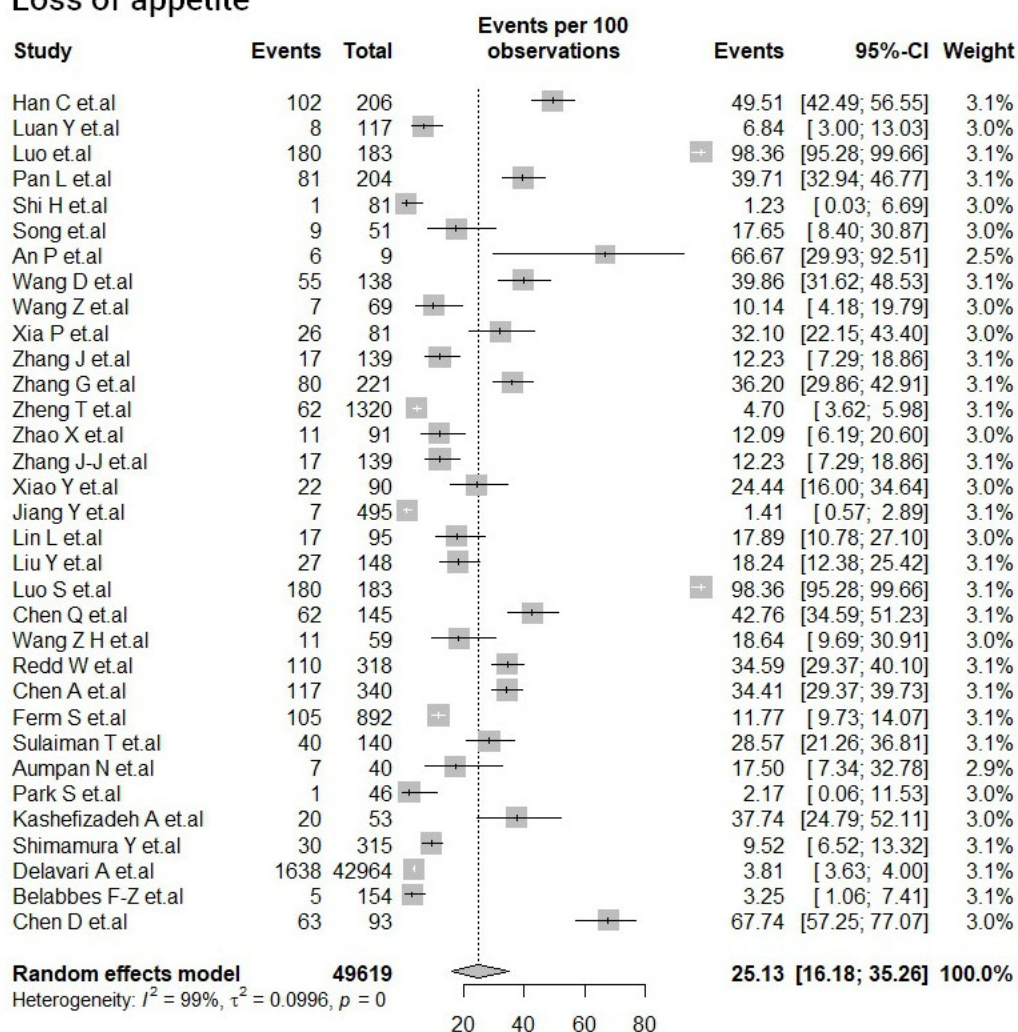

**Figure S5.** A pooled estimate of the prevalence of loss of appetite symptoms in COVID-19 infected patients.

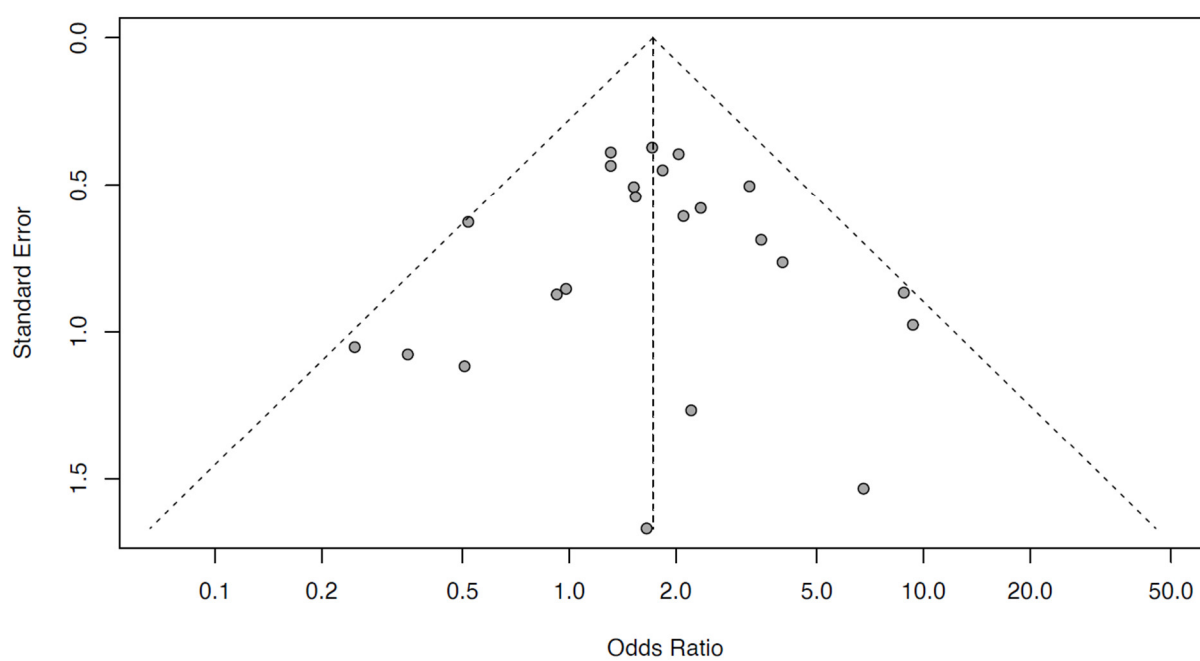

**Figure S6.** A funnel plot for publication bias for the severity of diarrhoea in COVID-19 infected patients.

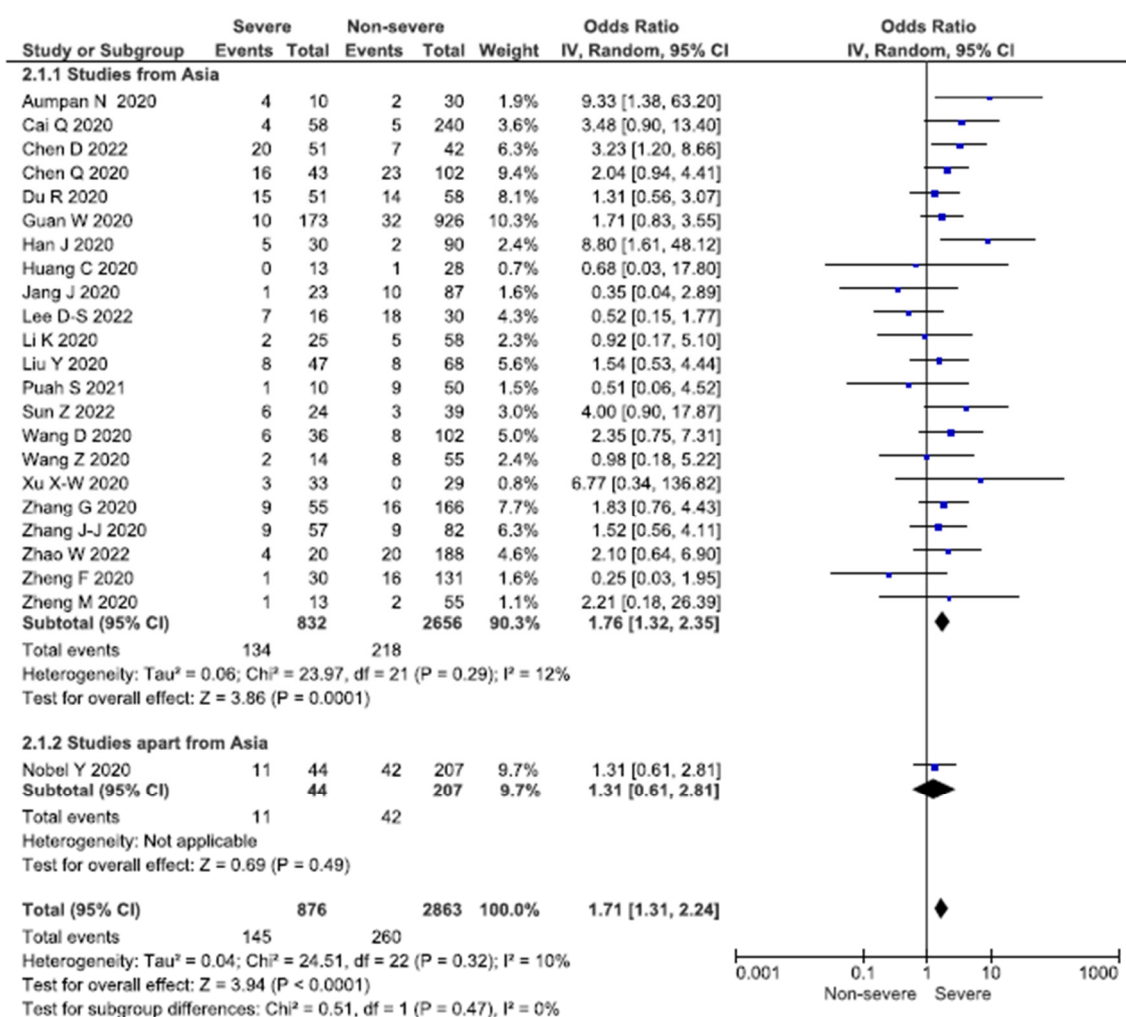

**Figure S7.** Forest plot demonstrating sub-groups analysis of COVID-19-infected patients' diarrhea in Asian *versus* non-Asian groups.

## References

1. Guan W-J, Ni Z-Y, Hu Y, Liang W-H, Ou C-Q, He J-X, et al. Clinical Characteristics of Coronavirus Disease 2019 in China. *New England Journal of Medicine*. 2020;382(18):1708-20.
2. Han J, Gong H, Fu L, Chen P, Wang S, Yuan J, et al. Clinical and CT imaging features of SARS-CoV-2 patients presented with diarrhea. *Journal of Infection*. 2020;81(6):e33-e5.
3. Chen Q, Zheng Z, Zhang C, Zhang X, Wu H, Wang J, et al. Clinical characteristics of 145 patients with corona virus disease 2019 (COVID-19) in Taizhou, Zhejiang, China. *Infection*. 2020;48(4):543-51.
4. Zheng M, Gao Y, Wang G, Song G, Liu S, Sun D, et al. Functional exhaustion of antiviral lymphocytes in COVID-19 patients. *Cellular & Molecular Immunology*. 2020;17(5):533-5.
5. Du RH, Liu LM, Yin W, Wang W, Guan LL, Yuan ML, et al. Hospitalization and Critical Care of 109 Decedents with COVID-19 Pneumonia in Wuhan, China. *Ann Am Thorac Soc*. 2020;17(7):839-46.
6. Zhang J-J, Dong X, Cao Y-Y, Yuan Y-D, Yang Y-B, Yan Y-Q, et al. Clinical characteristics of 140 patients infected with SARS-CoV-2 in Wuhan, China. *Allergy*. 2020;75(7):1730-41.
7. Huang C, Wang Y, Li X, Ren L, Zhao J, Hu Y, et al. Clinical features of patients infected with 2019 novel coronavirus in Wuhan, China. *The Lancet*. 2020;395(10223):497-506.
8. Zhao W, Li Y, Xie R, Dong Y, Wei Y, Cheng C, et al. Real-World Evidence for COVID-19 Delta Variant's Effects on the Digestive System and Protection of Inactivated Vaccines from a Medical Center in Yangzhou, China: A Retrospective Observational Study. *International Journal of Clinical Practice*. 2022;2022:1-9.
9. Sun Z, Song Z-G, Liu C, Tan S, Lin S, Zhu J, et al. Gut microbiome alterations and gut barrier dysfunction are associated with host immune homeostasis in COVID-19 patients. *BMC Medicine*. 2022;20(1).
10. Liu Y, Xiang L, Deng K. Focusing on Gastrointestinal Symptoms in COVID-19 Is Far From Enough. *Gastroenterology*. 2021;160(4):1429-30.e2.
11. Cai Q, Huang D, Ou P, Yu H, Zhu Z, Xia Z, et al. COVID-19 in a designated infectious diseases hospital outside Hubei Province, China. *Allergy*. 2020;75(7):1742-52.
12. Li K, Wu J, Wu F, Guo D, Chen L, Fang Z, et al. The Clinical and Chest CT Features Associated With Severe and Critical COVID-19 Pneumonia. *Invest Radiol*. 2020;55(6):327-31.
13. Wang Z, Yang B, Li Q, Wen L, Zhang R. Clinical Features of 69 Cases With Coronavirus Disease 2019 in Wuhan, China. *Clinical Infectious Diseases*. 2020;71(15):769-77.
14. Lee DS, Kim JW, Lee KL, Jung YJ, Kang HW. Significance of digestive symptoms after COVID-19 vaccination: A retrospective single-center study. *Am J Emerg Med*. 2022;58:154-8.
15. Aumpan N, Nunanan P, Vilaichone RK. Gastrointestinal manifestation as clinical predictor of severe COVID -19: A retrospective experience and literature review of COVID -19 in Association of Southeast Asian Nations ( ASEAN). *JGH Open*. 2020;4(6):1096-101.
16. Jang JG, Hur J, Choi EY, Hong KS, Lee W, Ahn JH. Prognostic Factors for Severe Coronavirus Disease 2019 in Daegu, Korea. *Journal of Korean Medical Science*. 2020;35(23).
17. Zg, F. Z, Tang W, Li H, Huang YX, Xie YL, et al. Clinical characteristics of 161 cases of corona virus disease 2019 (COVID-19) in Changsha. *European review for medical and pharmacological sciences*. 2020;24(6).
18. Nobel YR, Phipps M, Zucker J, Lebowitz B, Wang TC, Sobieszczyk ME, et al. Gastrointestinal Symptoms and Coronavirus Disease 2019: A Case-Control Study From the United States. *Gastroenterology*. 2020;159(1):373-5.e2.
19. Chen D, Ning M, Feng Y, Liu J. The early stage of COVID-19 pandemic: Gastrointestinal manifestations and liver injury in COVID-19 patients in Wuhan, China. *Front Med (Lausanne)*. 2022;9:997000.
20. Wang D, Hu B, Hu C, Zhu F, Liu X, Zhang J, et al. Clinical Characteristics of 138 Hospitalized Patients With 2019 Novel Coronavirus-Infected Pneumonia in Wuhan, China. *JAMA*. 2020;323(11):1061.
21. Xu X, Yu C, Qu J, Zhang L, Jiang S, Huang D, et al. Imaging and clinical features of patients with 2019 novel coronavirus SARS-CoV-2. *European Journal of Nuclear Medicine and Molecular Imaging*. 2020;47(5):1275-80.
22. Zhang G, Hu C, Luo L, Fang F, Chen Y, Li J, et al. Clinical features and short-term outcomes of 221 patients with COVID-19 in Wuhan, China. *Journal of Clinical Virology*. 2020;127:104364.
